# Supplementary material for: Gramene QTL database: development, content and applications
Source: Oxford University Press journal article supplement (doi:10.1093/database/bap005), 2009-01-01
Supplement: bap005_Supplementary_Data.zip [file bap005_Supplementary_Data.zip]

Supplemental Figure 1.

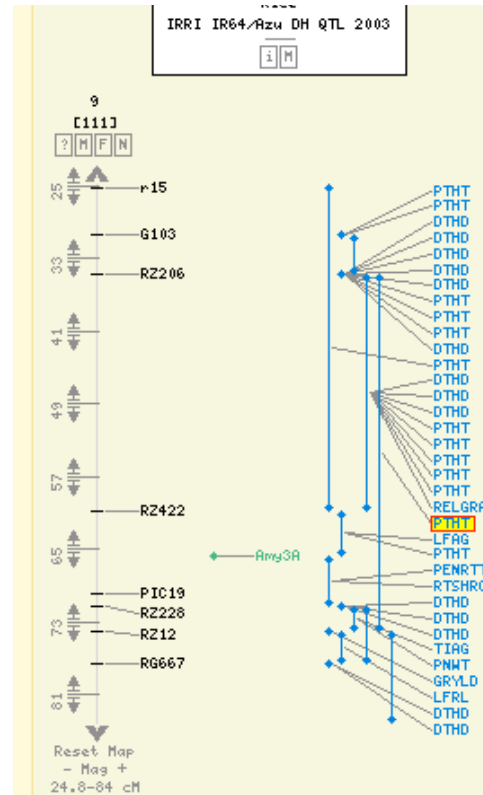

CMap View of QTLs on IR64Azucena mapping population Chr 9, showing highlighted QTL CQAX26, flanked by markers RZ206, RZ422.

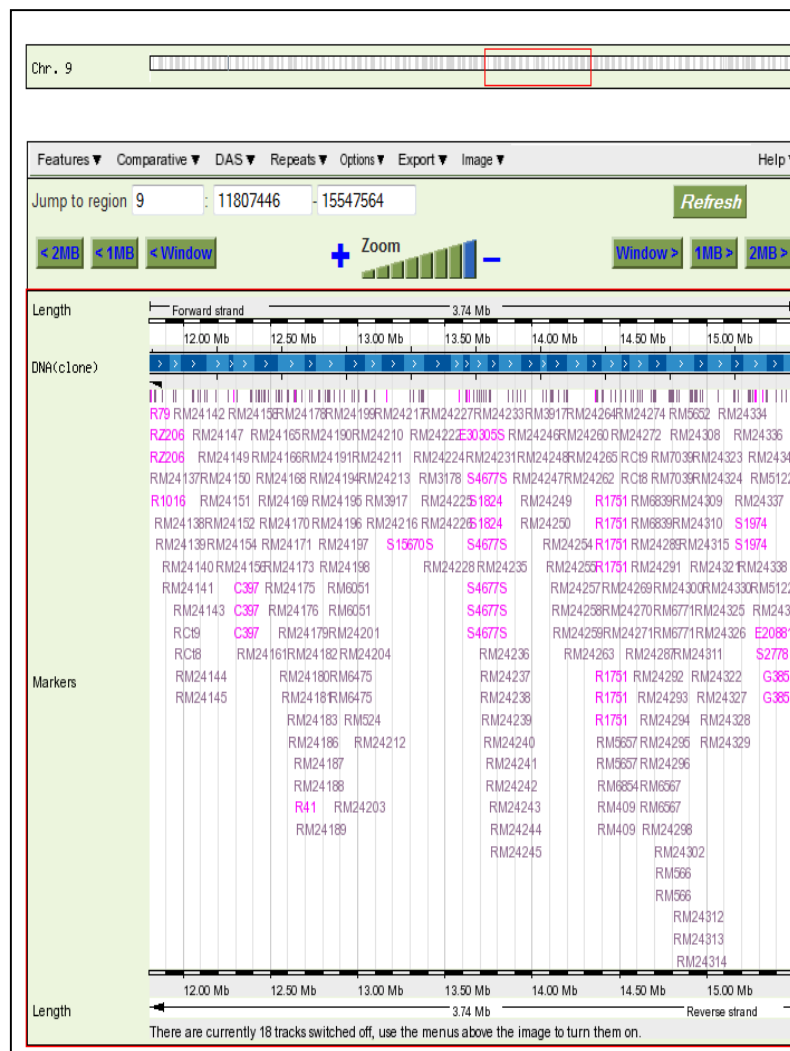[illegible]

A: P14 I31: 153 SSR and 15 RFLP markers within 11.8 – 15.5 genomic region.

B: P15 I4: Marker detailed info provided by Gramene, using RM566 as an example.

Supplementary Figure 3

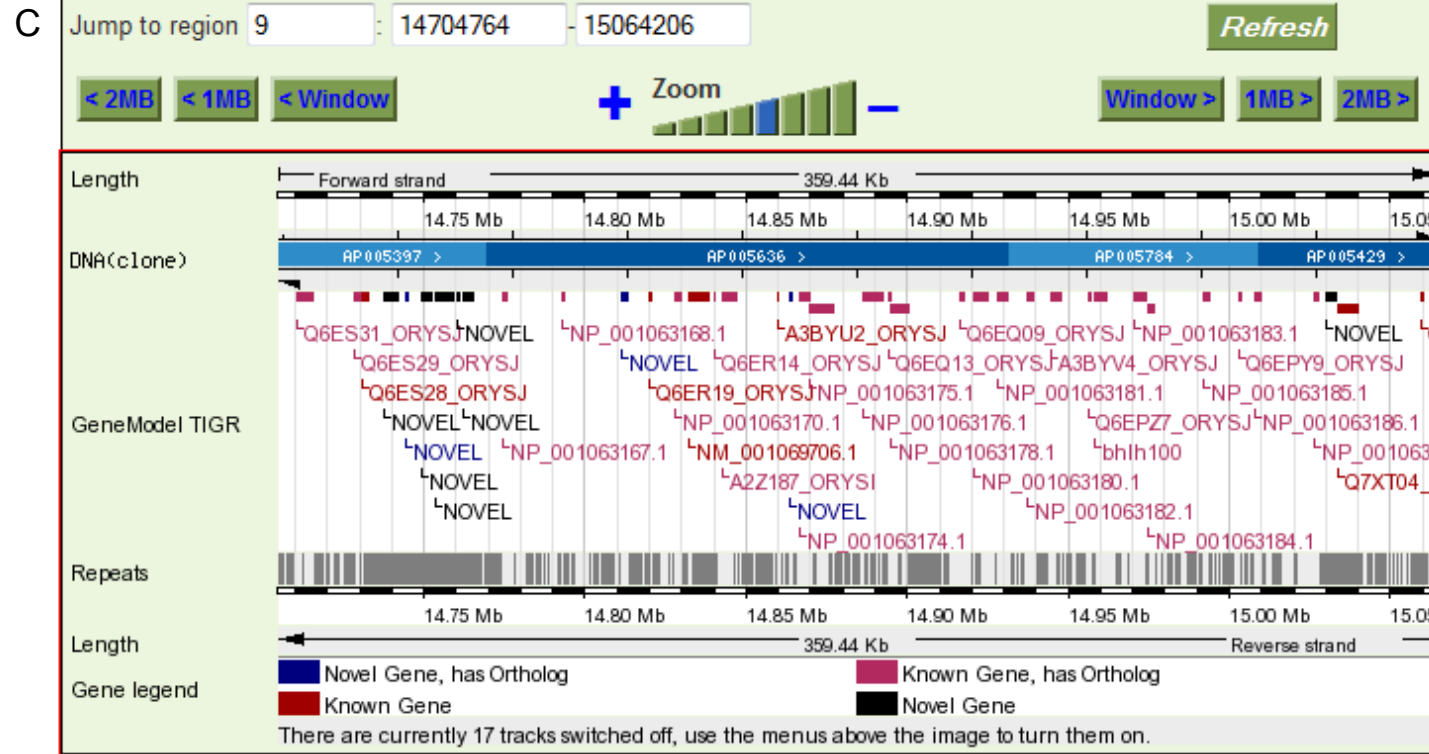

D

New Count Results

| Gramene Gene ID | Chromosome Name | Gene Start (bp) | Gene End (bp) | Strand |
|-----------------|-----------------|-----------------|---------------|--------|
| LOC_Os09g24810  | 9               | 14792755        | 14793393      | 1      |
| LOC_Os09g24880  | 9               | 14859622        | 14860185      | 1      |
| LOC_Os09g25100  | 9               | 15026139        | 15027688      | 1      |
| LOC_Os09g24890  | 9               | 14863763        | 14864002      | 1      |
| LOC_Os09g25060  | 9               | 14974931        | 14976712      | -1     |
| LOC_Os09g24850  | 9               | 14832051        | 14838356      | 1      |
| LOC_Os09g24720  | 9               | 14728630        | 14730118      | -1     |
| LOC_Os09g24770  | 9               | 14753593        | 14758908      | -1     |
| LOC_Os09g25130  | 9               | 15059396        | 15060349      | 1      |
| LOC_Os09g24740  | 9               | 14737436        | 14742086      | 1      |
| LOC_Os09g24900  | 9               | 14866361        | 14869926      | 1      |
| LOC_Os09g24970  | 9               | 14916135        | 14917910      | 1      |
| LOC_Os09g24749  | 9               | 14744411        | 14744847      | 1      |
| LOC_Os09g25070  | 9               | 14991802        | 14993887      | -1     |

P15, l10-12, l22-23: 41 Gene models within 14.7 – 15.1 Mb Genomic region:

C: Genome Browser detail viewer; D: Gene model retrieved by Mart.

Supplemental Figure 4

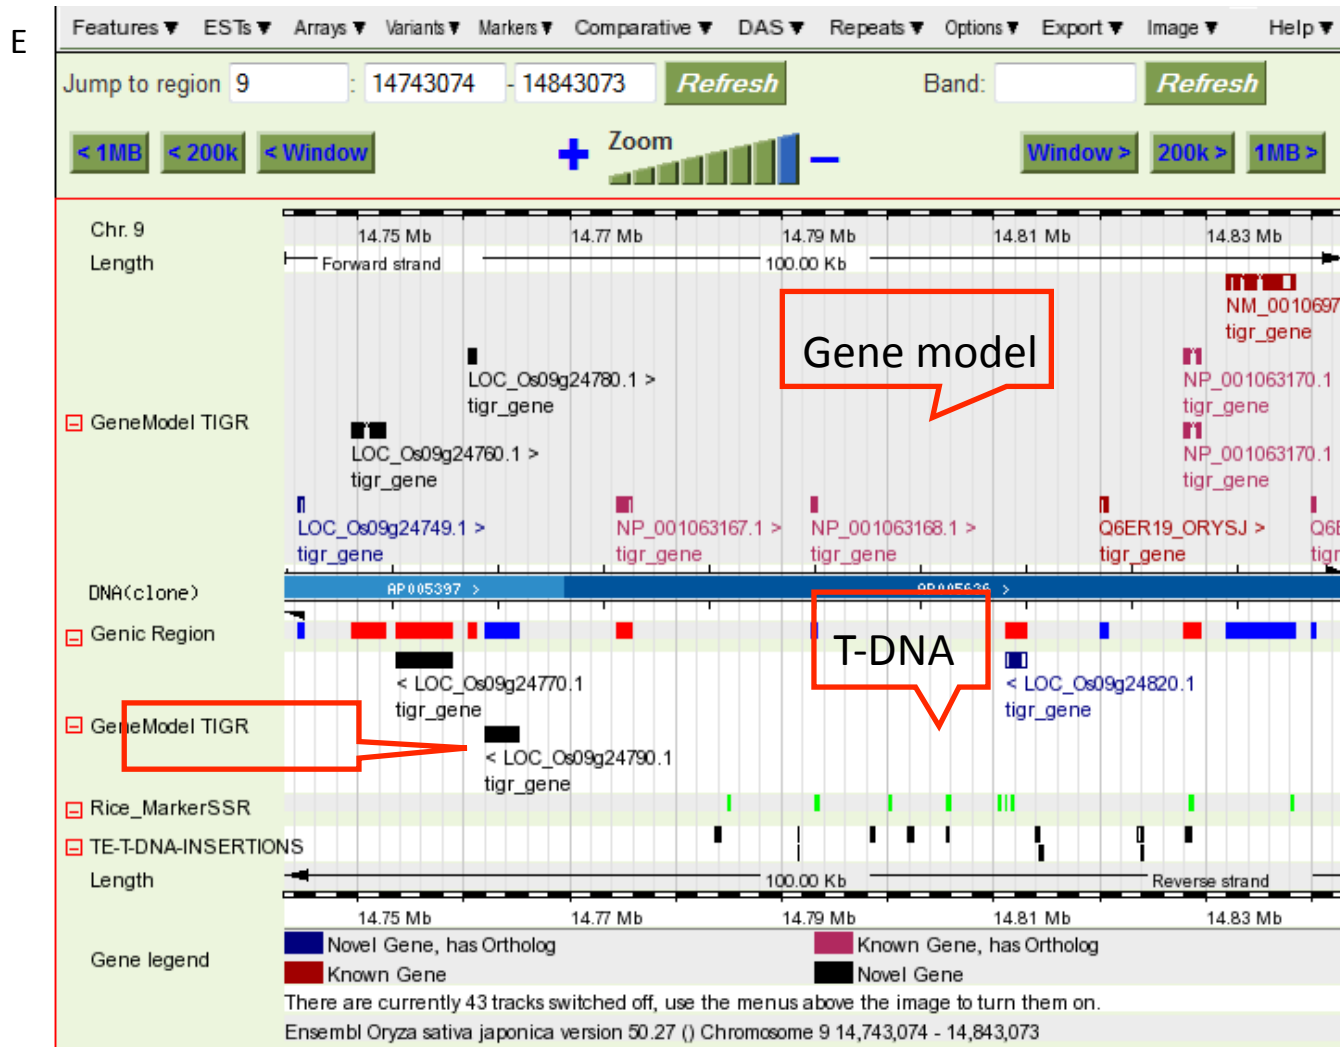

E: Gene models and T-DNA display within 14.7 -14.8 (0.1) Mb genomic region.

## Supplemental Figure 5

### F a) LOC\_Os09g24810

URL: [http://www.gramene.org/Oryza\\_sativa\\_japonica/geneview?gene=LOC\\_Os09g24810](http://www.gramene.org/Oryza_sativa_japonica/geneview?gene=LOC_Os09g24810)

Ensembl Gene Report for LOC\_Os09g24810

|                 |                                                                                                                                              |
|-----------------|----------------------------------------------------------------------------------------------------------------------------------------------|
| Gene            | NP_001063168.1 (RefSeq_peptide)                                                                                                              |
| Gene References | TIGR Locus: <a href="#">LOC_Os09g24810</a> mini zinc finger 3, putative ... <a href="#">more</a><br>IRGSP Gene: <a href="#">Os09g0414500</a> |

Orthologue Prediction

The following gene(s) have been identified as putative orthologues:

Species  
*Arabidopsis thaliana*

1-to-many [AT1G74660-TAIR-G](#) (Novel Ensembl prediction) [[MultiContigView](#)] [[Align](#)]  
MIF1 (MINI ZINC FINGER 1); DNA binding / transcription factor; Constitutive overexpression of MIF1 caused dramatic developmental defects, seedlings were non-responsive to gibberellin (GA) for cell elongation, hypersensitive to the [GA synthesis inhibitor](#) paclobutrazol (PAC) and abscisic acid (ABA), and hyposensitive to auxin, brassinosteroid and cytokinin, but normally responsive to ethylene.  
[Target %id: 42; Query %id: 38]

### b) LOC\_Os09g25150

URL: [http://pathway.gramene.org/RICE/NEW-IMAGE?type=GENE&object=LOC\\_OS09G25150.1](http://pathway.gramene.org/RICE/NEW-IMAGE?type=GENE&object=LOC_OS09G25150.1)



*O. sativa japonica* Gene: LOC\_Os09g25150.1

ID: LOC\_OS09G25150.1

Chromosome: Chromosome 9

Map Position: 15,075,603 <- 15,078,106 (nucleotides) 65.51 (centisomes)

Sequence Length: 2504 bp / 2501/3 AAs

Products: [dihydroflavonol-4-reductase, putative, expressed](#)

Reactions Catalyzed by Enzymes:  
[a 3β-hydroxy-δ<sup>5</sup>-steroid + NAD<sup>+</sup> = a 3-oxo-δ<sup>5</sup>-steroid + NADH + H<sup>+</sup>](#),  
[campest-4-en-3β-ol = campest-4-en-3-one](#)

Pathways Involving Enzymes: [brassinosteroid biosynthesis II](#)

Gene-Reaction Schematic: 

1.1.1.145

1.1.1.145

LOC\_Os09g25150.1

F: Annotation or pathway evidence of two identified candidate genes.
